# Supplementary figures and images for: E3 Ubiquitin Ligase TRIP12 Controls Exit from Mitosis via Positive Regulation of MCL-1 in Response to Taxol
Source: MDPI journal article supplement (doi:10.3390/cancers15020505), 2023-01-13

Supplementary Figure S1

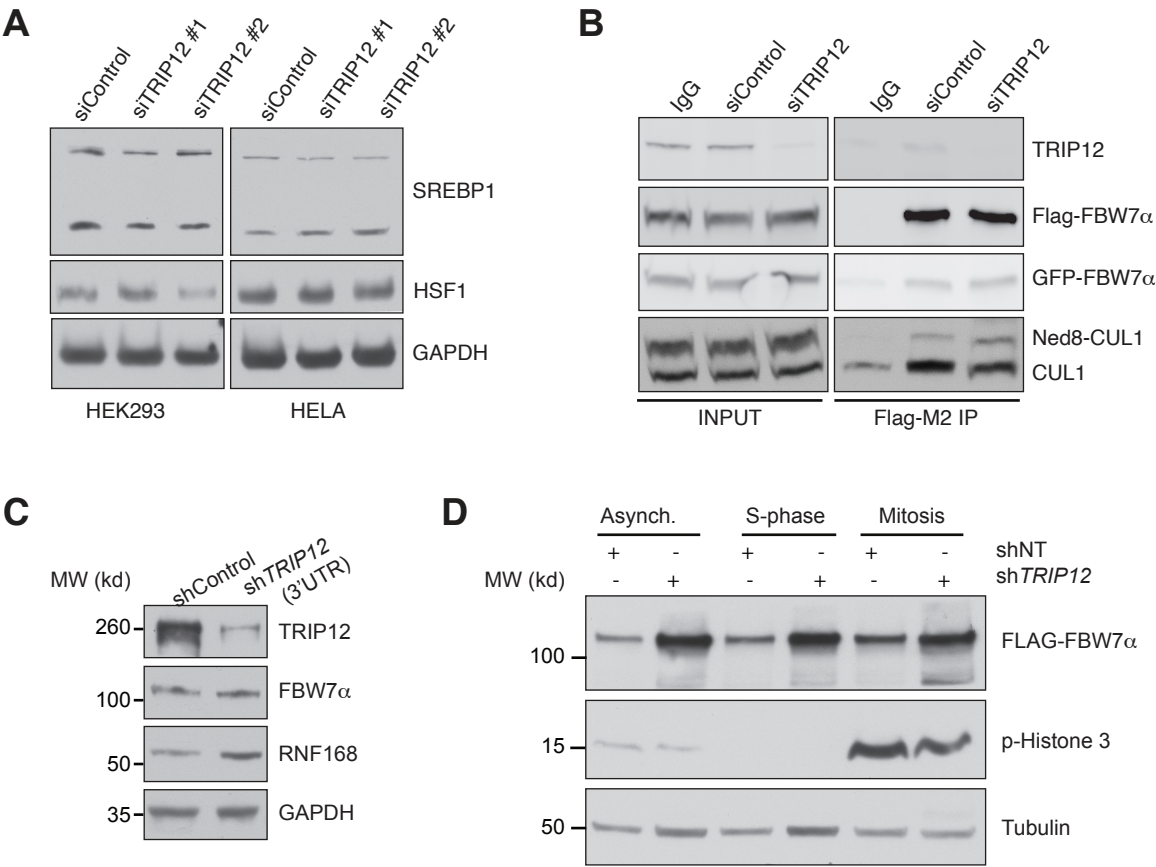

Supplementary Figure S2

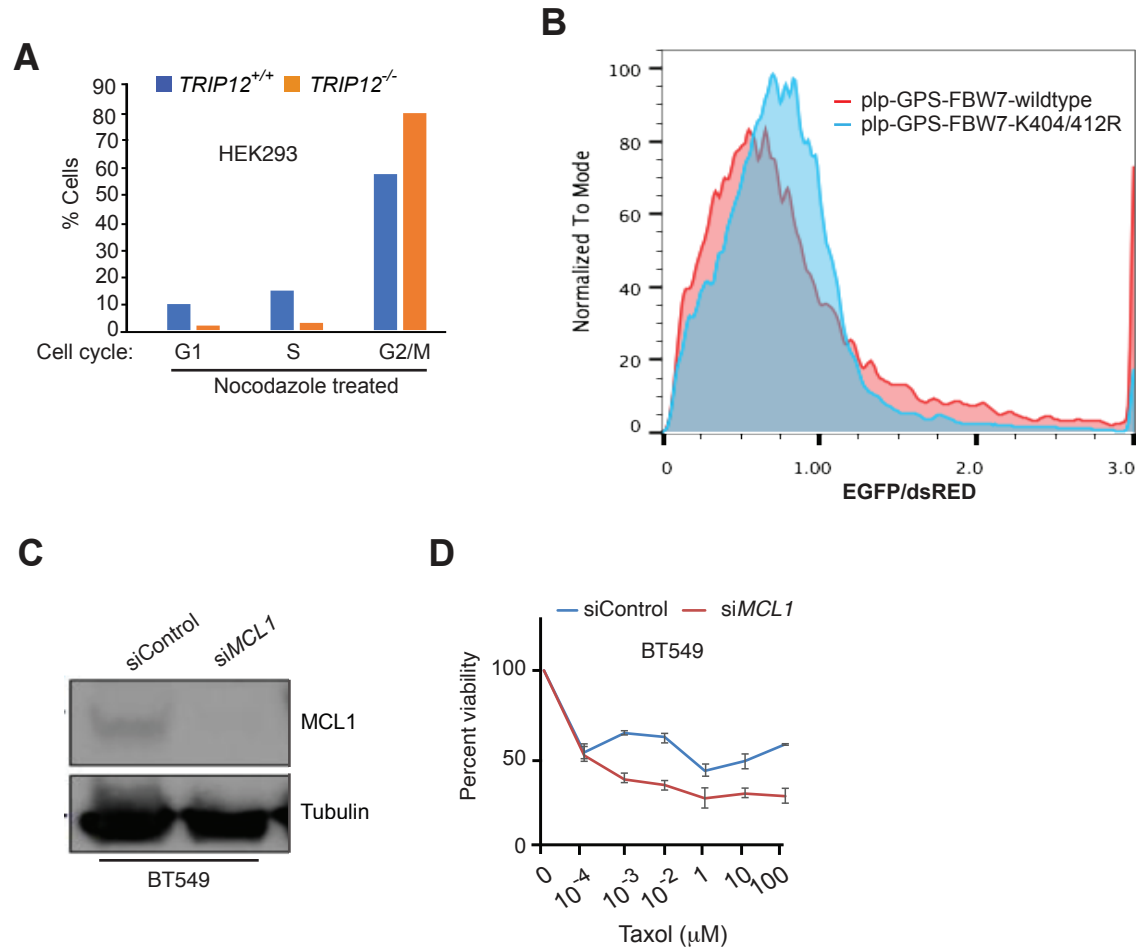

Supplement: s1 [file s1]
